# Supplementary material
Source: PubMed Central journal article supplement (PMC8667213)
Supplement: media-1.pdf [file media-1.pdf]

1  
2                   Global disparities in SARS-CoV-2 genomic surveillance  
3

4 Anderson F. Brito<sup>†, \*, 1, 2</sup>; Elizaveta Semenova<sup>†, 1, 3</sup>; Gytis Dudas<sup>†, 1, 4</sup>; Gabriel W. Hassler<sup>5</sup>;  
5 Chaney C. Kalinich<sup>1, 6</sup>; Moritz U.G. Kraemer<sup>7</sup>; Joses Ho<sup>8, 9</sup>; Houriiyah Tegally<sup>10</sup>; George  
6 Githinji<sup>11, 12</sup>; Charles N. Agoti<sup>11</sup>; Lucy E. Matkin<sup>7</sup>; Charles Whittaker<sup>13, 14</sup>; Danish Covid-19  
7 Genome Consortium; COVID-19 Impact Project; Network for Genomic Surveillance in South  
8 Africa (NGS-SA); GISAID core curation team; Benjamin P Howden<sup>15</sup>; Vitali Sintchenko<sup>16, 17</sup>;  
9 Neta S. Zuckerman<sup>18</sup>; Orna Mor<sup>18</sup>; Heather M Blankenship<sup>19</sup>; Tulio de Oliveira<sup>10, 20, 21, 22</sup>;  
10 Raymond T. P. Lin<sup>23</sup>; Marilda Mendonça Siqueira<sup>24</sup>; Paola Cristina Resende<sup>24</sup>; Ana Tereza R.  
11 Vasconcelos<sup>25</sup>; Fernando R. Spilki<sup>26</sup>; Renato Santana Aguiar<sup>27, 28</sup>; Ivailo Alexiev<sup>29</sup>; Ivan N.  
12 Ivanov<sup>29</sup>; Ivva Philipova<sup>29</sup>; Christine V. F. Carrington<sup>30</sup>; Nikita S. D. Sahadeo<sup>30</sup>; Céline Gurry<sup>8</sup>;  
13 Sebastian Maurer-Stroh<sup>8, 9, 23</sup>; Dhamari Naidoo<sup>31</sup>; Karin J von Eije<sup>32, 33</sup>; Mark D. Perkins<sup>33</sup>; Maria  
14 van Kerkhove<sup>33</sup>; Sarah C. Hill<sup>34</sup>; Ester C. Sabino<sup>35</sup>; Oliver G. Pybus<sup>7, 34</sup>; Christopher Dye<sup>7</sup>; Samir  
15 Bhatt<sup>13, 14, 36</sup>; Seth Flaxman<sup>37</sup>; Marc A. Suchard<sup>5, 38, 39</sup>; Nathan D. Grubaugh<sup>‡, 1, 40</sup>; Guy Baele<sup>‡, 41</sup>;  
16 Nuno R. Faria<sup>‡, \*, 7, 13, 16, 35</sup>

17  
18 \* Co-corresponding authors (AFB: [andersonfbrito@gmail.com](mailto:andersonfbrito@gmail.com) and NRF: [nfaria@ic.ac.uk](mailto:nfaria@ic.ac.uk))

19 † Co-first authorship

20 ‡ Co-senior authorship

21  
22  
23 **This PDF file includes:**

24 Materials and Methods

25 Table S1–S8

26 Fig. S1–S7

27  
28  
29  
30

## 31 **Materials and Methods**

### 32 33 **Genomic surveillance and epidemiological data**

34 To obtain the percentage of sequenced cases for each country, per week and cumulative, we used  
35 metadata related to the “country of exposure” of genomes submitted to GISAID (36) up to May  
36 30th, 2021, collected between epidemiological weeks (EWs) 9 of 2020 (February 23rd, 2020) and  
37 12 of 2021 (March 27th, 2021). We obtained global daily COVID-19 case counts from Johns  
38 Hopkins University, Center for Systems Science and Engineering (CSSE)  
39 (<http://github.com/CSSEGISandData/COVID-19>), and population data from each country from  
40 the United Nations’ Department of Economic and Social Affairs (37). Countries were grouped by  
41 income using the current classification by the World Bank (38). We calculated weekly percentages  
42 of COVID-19 cases sequenced per country by aggregating and dividing genome and case counts  
43 per EW, using a custom pipeline ‘subsampler’ (<http://github.com/andersonbrito/subsampler>).  
44

### 45 **Analysis of covariates correlated with genomic surveillance capacity**

46 Covariates related to health systems were available from (39), GDP data were available from (40)  
47 and data on R&D expenditure per capita were available from (41). For the covariates from (39)  
48 we have selected their values for the year 2019, for GDP data from (40) for the year 2015, and for  
49 R&D expenditure we calculated country-wise means for the years 2013 through 2019. Influenza  
50 virus genomic data (HA segment) collected in 2019 were obtained from GISAID (8), and 2019  
51 influenza death estimate data were downloaded from the IHME Global Burden of Disease Study  
52 2019 (39). Correlations and covariate details are provided in **Table S5**. To calculate correlations,  
53 the percentage of sequenced cases was log<sub>10</sub>-transformed. Transformations applied to covariates  
54 are provided in **Table S6**, in column ‘transformation’. For each covariate we have estimated a  
55 linear fit by applying a generalised linear model, regressing a (possibly, transformed, as indicated  
56 in **Table S6**) covariate onto the log<sub>10</sub>-transformed percentage of sequenced cases; *p*-values  
57 corresponding to the estimated slopes are available in Fig.s S3 and S4, column ‘*p*-value’.  
58

### 59 **Simulation of scenarios of genome sampling**

60 As shown in Figure 1, Denmark has one of the most comprehensive genomic surveillance  
61 programs in this COVID-19 pandemic, sequencing around 35.6% of its reported cases up to May  
62 16th, 2021 (260,183 cases and 92,592 genomes with >70% coverage; access date: May 30th, 2021)  
63 (43). In order to simulate the impact of the percentage of sequenced cases and the turnaround time  
64 (time between sample collection and genome submission) to reliably detect previously identified  
65 SARS-CoV-2 lineages in a country, we used metadata from genomes obtained by the Danish  
66 COVID-19 genome consortium, with collection dates between March and November 2020 (from  
67 EW 13 to EW 49) (43), to avoid potential distortions in lineage frequency caused by the  
68 preferential selection of variants for sequencing using S gene target failure (SGTF) data.  
69

70 To evaluate the impact of delays on genome submission, based on the reported dates of sample  
71 collection, we generated lists of genomes with adjusted submission dates, to simulate turnaround  
72 times representing delays between 7 and 35 days (five weeks) between sample collection and  
73 genome submission. Considering the high percentage of sequenced cases per EW in Denmark  
74 (often above 20%), we produced several genome datasets simulating scenarios with different  
75 percentages of sequenced cases per EW (0.05%, 0.1%, 0.5%, 1% and 5%). By doing so we were  
76 able to simulate 25 scenarios (with 100 replicates each) with combinations of different turnaround  
77 times and percentage of sequenced cases, to assess how these two parameters may impact our  
78 ability (expressed as a probability) to detect circulating lineages. Specifically, we randomly

79 sampled each column of the observed data (considered to be case counts across all circulating  
80 lineages) according to the targeted percentage of sequenced cases, which would become available  
81 after a given turnaround time. Each combination of percentage of sequenced cases and turnaround  
82 time yielded one table of genomes available across the EWs. This procedure was repeated 100  
83 times to mitigate random sampling effects and to generate a probability of detection for each  
84 circulating lineage. Summarizing the 100 replicates led to detection probabilities for each lineage  
85 in each epi week.

86  
87 **Fig. 2A** shows the probability of not drawing 0 from a Poisson distribution whose mean is the  
88 product of lineage prevalence and sequenced cases. In **Fig. 2B**, we show the computed  
89 probabilities of detection across simulation replicates, at a given sampling frequency and delay,  
90 which were able to have at least one detection of a given lineage before reaching a cumulative size  
91 of 100 cases in the full dataset without delays (“ground truth”, see **Fig. S8**). **Figs. 2C-G** similarly  
92 map this out, but in time, asking how long it takes for a given lineage to be detected over time  
93 using the first instance of a lineage in the “ground truth” dataset as its emergence.

94  
95

96 **Table S1.** Percentage of sequenced COVID-19 cases per country per epidemiological week (EW),  
97 between February 23rd, 2020 and March 27th, 2021 (based on metadata submitted to GISAID up  
98 to May 30th, 2021). The data shown here are the same used in Figure 1A to display weekly  
99 sequencing percentages. X = No cases; Code = ISO 3166-1 alpha-3; Income category = income  
100 category, according to the World Bank classification; Frequency of sampling = Proportion of  
101 weeks with at least one genome.

102  
103 *[Available as a separate Excel file]*

104  
105  
106 **Table S2.** List of countries that mostly relied on other countries to get their COVID-19 cases  
107 sequenced.

108  
109 *[Available as a separate Excel file]*

110  
111 **Table S3.** Total number of sequenced SARS-CoV-2 genomes between February 23rd, 2020 and  
112 March 27th, 2021 (based on metadata submitted to GISAID up to May 30th, 2021), number of  
113 COVID-19 cases, and overall percentage of sequenced cases, per income category, according to  
114 the World Bank classification (year: 2019).

115  
116

| Income category | Total genomes | Total cases | Overall percentage of sequenced cases |
|-----------------|---------------|-------------|---------------------------------------|
| High income     | 1,182,367     | 65,387,757  | 1.81%                                 |
| Low-mid income  | 70,164        | 61,202,215  | 0.11%                                 |

117

118

119 **Table S4.** Key surveillance characteristics with a split by income class. We provide summary  
 120 statistics of observed surveillance characteristics for each group of countries, defined by their  
 121 income class. HIC - high income class, UMC - upper middle income class, LMC - low middle  
 122 income class, LIC - lower income class, non-HIC - combined UMC, LMC and LIC.  
 123

|                     | <b>Surveillance intensity</b>                      |                                                 | <b>Timeliness</b>                                     |                                                    | <b>Regularity</b>                                        |                                                       |
|---------------------|----------------------------------------------------|-------------------------------------------------|-------------------------------------------------------|----------------------------------------------------|----------------------------------------------------------|-------------------------------------------------------|
| <b>Income class</b> | Overall percentage of sequenced cases $\geq 0.5\%$ | Overall percentage of sequenced cases $< 0.5\%$ | Genomes submitted with turnaround time $\leq 21$ days | Genomes submitted with turnaround time $> 21$ days | Countries sequencing genomes in $\geq 75\%$ of the weeks | Countries sequencing genomes in $< 75\%$ of the weeks |
| LIC                 | 0.41                                               | 0.59                                            | 0.00                                                  | 1.00                                               | 0.00                                                     | 1.00                                                  |
| LMC                 | 0.22                                               | 0.78                                            | 0.05                                                  | 0.95                                               | 0.20                                                     | 0.80                                                  |
| UMC                 | 0.18                                               | 0.82                                            | 0.02                                                  | 0.98                                               | 0.29                                                     | 0.71                                                  |
| HIC                 | 0.69                                               | 0.31                                            | 0.14                                                  | 0.86                                               | 0.59                                                     | 0.41                                                  |
| non-HIC*            | 0.23                                               | 0.77                                            | 0.03                                                  | 0.97                                               | 0.21                                                     | 0.79                                                  |

124  
 125  
 126

127 **Table S5.** Typical country profiles characterised by covariates. We provide typical values of  
 128 covariates which characterise capacity and coordination abilities for each group of countries,  
 129 linked to their income level. HIC - high income country, UMC - upper middle income country,  
 130 LMC - low middle income country, LIC - low income country.  
 131

| Covariate                 | HIC       | UMC  | LMC  | LIC  | Covariate name                                 | Covariate description                                                                                                                                     |
|---------------------------|-----------|------|------|------|------------------------------------------------|-----------------------------------------------------------------------------------------------------------------------------------------------------------|
| gdp                       | 3555<br>6 | 5280 | 1478 | 416  | GDP per capita                                 | GDP per capita                                                                                                                                            |
| erd                       | 732       | 86   | 19   | 5    | Expenditure on R&D per capita                  | Expenditure on R&D per capita in PPP (purchasing power parity dollars)                                                                                    |
| he_cap                    | 2941      | 1019 | 311  | 90   | Health expenditure (per capita)                | The variable is health expenditure per capita taken from FGH April 2019, in 2018 USD                                                                      |
| sdi                       | 0.83      | 0.68 | 0.53 | 0.33 | Socio-demographic Index                        | A measure of development estimated via principal component analysis using log-transformed LDI, TFR (ages 25+), and education years per capita over age 15 |
| fluprop                   | 1.84      | 0.53 | 0.16 | 0.11 | Proportion of sequenced Flu cases in 2019      | Genomic surveillance capacity                                                                                                                             |
| edu_gini_mat              | 0.13      | 0.17 | 0.30 | 0.52 | Education Relative Inequality (Gini), maternal | Education Relative Inequality (Gini), maternal                                                                                                            |
| gallup_neg_exp_index      | 27        | 29   | 28   | 31   | Gallup: Negative Experience Index              | Negative Experience Index estimated via the Gallup World Poll surveys                                                                                     |
| universal_health_coverage | 87        | 71   | 56   | 42   | Universal health coverage                      | Coverage of universal health coverage tracer interventions for prevention and treatment services, percent; created for GBD 2015 SDGs paper.               |
| health_worker_density     | 296       | 129  | 56   | 22   | Health worker density                          | Number of employed health workers (of any specialty) per 10,000 population                                                                                |
| hospital_beds_per1000     | 4.19      | 2.96 | 1.81 | 0.66 | Hospital Beds (per 1000)                       | Hospital beds per 1000 people                                                                                                                             |
| ifd_coverage_prop         | 0.99      | 0.97 | 0.82 | 0.66 | In-Facility Delivery (proportion)              | Percent of women giving birth in a health facility                                                                                                        |
| occ_professional          | 0.15      | 0.10 | 0.06 | 0.04 | Occupation Professionals                       | The proportion of the employed population ages 15-                                                                                                        |

|                    |      |      |      |      |                                        |                                                                                             |
|--------------------|------|------|------|------|----------------------------------------|---------------------------------------------------------------------------------------------|
|                    |      |      |      |      |                                        | 69 working as professionals<br>(according to ISCO<br>classifications)                       |
| pharmacists<br>_pc | 14   | 6    | 3    | 1    | Pharmacists per capita                 | Number of employed<br>pharmacists and<br>pharmaceutical assistants per<br>10,000 population |
| physicians_<br>pc  | 29   | 17   | 8    | 2    | Physicians per capita                  | Number of employed medical<br>doctors per 10,000 population                                 |
| prop_urban         | 0.42 | 0.35 | 0.33 | 0.25 | Urbanicity                             | Urbanicity                                                                                  |
| haqi               | 86   | 65   | 46   | 30   | Healthcare access and<br>quality index | Healthcare access and quality<br>index                                                      |

---

132  
133  
134

135 **Table S6.** Correlations of country-level covariates with the percentage of sequenced COVID-19  
 136 cases. ‘Transformation’ column denotes the transformation applied to the corresponding covariate  
 137 before assessing the correlation; the *p*-value column shows significance of the slope in a linear  
 138 model.

| Covariate             | Correlation | Transformation | <i>p</i> -value | Covariate name                                 | Covariate description                                                                                                                                     |
|-----------------------|-------------|----------------|-----------------|------------------------------------------------|-----------------------------------------------------------------------------------------------------------------------------------------------------------|
| erd                   | 0.47        | log            | 4E-07           | Expenditure on R&D per capita                  | Expenditure on R&D per capita in PPP (purchasing power parity dollars)                                                                                    |
| av_gdp                | 0.37        | log            | 6E-07           | GDP per capita                                 | GDP per capita                                                                                                                                            |
| frac_oop_hexp         | -0.35       | no             | 9E-06           | Fraction of OOP Health Expenditure             | Fraction of out-of-pocket health expenditure out of total health expenditure, from FGH April 2019                                                         |
| sdi                   | 0.31        | logit          | 9E-05           | Socio-demographic Index                        | A measure of development estimated via principal component analysis using log-transformed LDI, TFR (ages 25+), and education years per capita over age 15 |
| fluprop               | 0.30        | log            | 9E-04           | Percentage of sequenced Flu cases in 2019      | Genomic surveillance capacity                                                                                                                             |
| anc1_coverage_prop    | 0.28        | logit          | 6E-04           | Antenatal Care (1 visit) Coverage (proportion) | Proportion of pregnant women receiving any antenatal care from a skilled provider                                                                         |
| he_cap                | 0.28        | log            | 6E-04           | Health expenditure (per capita)                | The variable is health expenditure per capita taken from FGH April 2019, in 2018 USD                                                                      |
| health_worker_density | 0.28        | log            | 6E-04           | Health worker density                          | Number of employed health workers (of any specialty) per 10,000 population                                                                                |
| occ_professional      | 0.27        | no             | 8E-04           | Occupation Professionals                       | The proportion of the employed population ages 15-69 working as professionals (according to ISCO classifications)                                         |

|                           |       |       |       |                                                        |                                                                                                                                             |
|---------------------------|-------|-------|-------|--------------------------------------------------------|---------------------------------------------------------------------------------------------------------------------------------------------|
| universal_health_coverage | 0.25  | no    | 3E-03 | Universal health coverage                              | Coverage of universal health coverage tracer interventions for prevention and treatment services, percent; created for GBD 2015 SDGs paper. |
| haqi                      | 0.24  | no    | 3E-03 | Healthcare access and quality index                    | Healthcare access and quality index                                                                                                         |
| hospital_beds_per1000     | 0.22  | log   | 8E-03 | Hospital Beds (per 1000)                               | Hospital beds per 1000 people                                                                                                               |
| pharmacists_pc            | 0.21  | log   | 8E-03 | Pharmacists per capita                                 | Number of employed pharmacists and pharmaceutical assistants per 10,000 population                                                          |
| edu_gini_mat              | -0.2  | logit | 2E-02 | Education Relative Inequality (Gini), maternal         | Education Relative Inequality (Gini), maternal                                                                                              |
| gallup_neg_exp_index      | -0.19 | no    | 2E-02 | Gallup: Negative Experience Index                      | Negative Experience Index estimated via the Gallup World Poll surveys                                                                       |
| contra_demand_satisfied   | 0.18  | no    | 3E-02 | Demand for contraception satisfied with modern methods | Proportion of women with a demand for contraception that are using a modern method                                                          |
| ifd_coverage_prop         | 0.17  | logit | 4E-02 | In-Facility Delivery (proportion)                      | Percent of women giving birth in a health facility                                                                                          |
| physicians_pc             | 0.12  | log   | 1E-01 | Physicians per capita                                  | Number of employed medical doctors per 10,000 population                                                                                    |
| war_rate                  | -0.11 | logit | 2E-01 | Mortality Rate Due to War Shocks (per 1 person)        | Mortality rate per one person due to war and terrorism (cause_id: 945); updated for GBD 2016 definition of war and terrorism                |
| prop_urban                | 0.03  | no    | 7E-01 | Urbanicity                                             | Urbanicity                                                                                                                                  |

140 **Table S7.** Correlations of country-level covariates with the mean turnaround time.  
 141 'Transformation' column denotes the transformation applied to the corresponding covariate before  
 142 assessing the correlation; the *p*-value column shows significance of the slope in a linear model.

| Covariate                 | Correlation | Transformation | <i>p</i> -value | Covariate name                                         |
|---------------------------|-------------|----------------|-----------------|--------------------------------------------------------|
| universal_health_coverage | -0.45       | no             | 2E-08           | Universal health coverage                              |
| haqi                      | -0.44       | no             | 4E-08           | Healthcare access and quality index                    |
| sdi                       | -0.42       | logit          | 3E-07           | Socio-demographic Index                                |
| he_cap                    | -0.4        | log            | 1E-06           | Health expenditure (per capita)                        |
| health_worker_density     | -0.37       | log            | 4E-06           | Health worker density                                  |
| av_gdp                    | -0.34       | log            | 9E-06           | GDP per capita                                         |
| edu_gini_mat              | 0.33        | logit          | 6E-05           | Education Relative Inequality (Gini), maternal         |
| hospital_beds_per1000     | -0.33       | log            | 5E-05           | Hospital Beds (per 1000)                               |
| erd                       | -0.32       | log            | 1E-03           | Expenditure on R&D per capita                          |
| occ_professional          | -0.31       | no             | 2E-04           | Occupation Professionals                               |
| ifd_coverage_prop         | -0.3        | logit          | 3E-04           | In-Facility Delivery (proportion)                      |
| physicians_pc             | -0.3        | log            | 3E-04           | Physicians per capita                                  |
| pharmacists_pc            | -0.29       | log            | 5E-04           | Pharmacists per capita                                 |
| anc1_coverage_prop        | -0.24       | logit          | 5E-03           | Antenatal Care (1 visit) Coverage (proportion)         |
| contra_demand_satisfied   | -0.23       | no             | 7E-03           | Demand for contraception satisfied with modern methods |
| prop_urban                | -0.2        | no             | 2E-02           | Urbanicity                                             |

|                      |       |       |       |                                                                             |
|----------------------|-------|-------|-------|-----------------------------------------------------------------------------|
| fluprop              | -0.18 | log   | 5e-02 | Percentage of sequenced<br>Flu cases in 2019                                |
| gallup_neg_exp_index | 0.16  | no    | 6e-02 | Negative Experience Index<br>estimated via the Gallup<br>World Poll surveys |
| war_rate             | 0.16  | logit | 6E-02 | Mortality Rate Due to War<br>Shocks (per 1 person)                          |
| frac_oop_hexp        | 0.15  | no    | 7E-02 | Fraction of OOP Health<br>Expenditure                                       |

---

143  
144  
145  
146  
147  
148  
149  
150  
151

**Table S8.** GISAID acknowledgment Table (also available at [gisaid.org](https://gisaid.org) with set accession EPI\_SET\_20211008ez).

*[Available as a separate TSV file]*



152  
153  
154  
155  
156  
157  
158  
159  
160  
161  
162

**Fig. S1.** Overall percentage of sequenced cases per country, between EW09 of 2020 and EW12 of 2021. The data shown here are the same used in Figure 1 to display weekly sequencing percentages. (A) Sequencing percentages observed when “country of exposure” is used as data source for defining the geographic origin of genomes, to reflect the locations where infections started (instead of where cases were detected). (B) Sequencing percentages observed when “country of sampling” is used as data source for defining the geographic origin of genomes, to reflect the locations where the infections were detected and where the cases were sequenced. As shown, genomic surveillance in some countries (marked with \*, asterisks) rely entirely on data obtained abroad, generated from travel cases.

163  
164  
165  
166  
167



168  
169  
170  
171  
172  
173

**Fig. S2.** Countries that rely mostly on other countries' capacity for genome sequencing and submission. Countries that rely on external resources are highlighted with shades of purple, based on the percentage of their cases that were sequenced and submitted by other countries.



174  
175  
176  
177  
178  
179  
180

**Fig. S3.** Correlation between weekly COVID-19 incidence per 100,000 habitants, and percentage of sequenced cases in (A) Oceania & Asia, (B) Europe, (C) Africa and (D) the Americas, using the same data displayed in Figure 1, where each point represents an epidemiological week in a country. Vertical dashed lines represent the threshold of 5% sequenced cases, while the horizontal line marks 100 cases per 100,000 habitants (high COVID-19 incidence).



181  
 182  
 183  
 184  
 185  
 186  
 187

**Fig. S4. Turnaround time across geographic regions.** Delays between sample collection and genome submission across epidemiological weeks (turnaround time) in different regions, between February 23rd, 2020 and March 27th, 2021, based on metadata submitted to GISAID up to May 30th, 2021.



188  
 189  
 190  
 191  
 192  
 193  
 194  
 195

**Fig. S5.** Correlation between  $\log_{10}$ -transformed number of detected lineages and  $\log_{10}$ -transformed (A) number of sequenced genomes and (B) percentages of sequenced cases per country.



196  
197  
198  
199  
200  
201

**Fig. S6.** Relative frequency of lineages detected in Denmark between epi weeks 13 and 49 (grouped by collection dates). In this period the country sequenced more than 20% of its reported cases, on average, and this dataset was used as the ‘ground truth’ for the simulations of probabilities of lineage detection shown in Figure 2B-G.



202  
 203  
 204  
 205  
 206  
 207

**Fig. S7.** Covariates that show the highest negative correlation with the mean turnaround time. **(A)** Universal health coverage; **(B)** Socio-demographic Index; **(C)** Health expenditure (per capita); **(D)** GDP per capita, in USD. The colour scheme of geographic regions is the same used in Figure 1. A solid line shows the linear fit in each figure.
